# Supplementary material for: Seventy-Two-Hour LRRK2 Kinase Activity Inhibition Increases Lysosomal GBA Expression in H4, a Human Neuroglioma Cell Line
Source: MDPI journal article supplement (doi:10.3390/ijms23136935), 2022-06-22
Supplement: s1 [file s1]

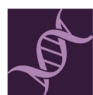

Article

# Seventy-Two-Hour LRRK2 Kinase Activity Inhibition Increases Lysosomal GBA Expression in H4, a Human Neuroglioma Cell Line

Clara Ruz <sup>1,2</sup>, José Luis Alcantud <sup>2</sup>, Francisco Vives <sup>1,2</sup>, Francisco Arrebola <sup>2,3</sup>, John Hardy <sup>4</sup>, Patrick A. Lewis <sup>4,5</sup>, Claudia Manzoni <sup>6</sup> and Raquel Duran <sup>1,2\*</sup>

<sup>1</sup> Department of Physiology, Faculty of Medicine, Universidad de Granada, 18016, Granada, Spain; clararuz@ugr.es (C.R.); fvives@ugr.es (F.V.)

<sup>2</sup> Institute of Neurosciences “Federico Olóriz”, Centro de Investigación Biomédica (CIBM), Universidad de Granada, 18016 Granada, Spain; clararuz@ugr.es (CR); jalcantud@ugr.es (JLA); fav@ugr.es (FA)

<sup>3</sup> Department of Histology, Faculty of Medicine, Universidad de Granada, 18016 Granada, Spain; fav@ugr.es

<sup>4</sup> Department of Neurodegenerative Disease, UCL Queen Square Institute of Neurology, WC1N 3BG London, UK; j.hardy@ucl.ac.uk (J.H.); plewis@rvc.ac.uk (P.A.L.)

<sup>5</sup> Department of Comparative Biomedical Science, Royal Veterinary College, Royal College Street, NW1 0TU London, UK

<sup>6</sup> Department of Pharmacology, UCL School of Pharmacy, WC1N 1AX London, UK; c.manzoni@ucl.ac.uk

\* Correspondence: rduran@ugr.es

## Supplementary Materials

**Citation:** Ruz, C.; Alcantud, J.L.; Vives, F.; Arrebola, F.; Hardy, J.; Lewis, P.A.; Manzoni, C.; Duran, R. Seventy-Two Hour LRRK2 Kinase Activity Inhibition Increases Lysosomal GBA Expression in H4, a Human Neuroglioma Cell Line. *Int. J. Mol. Sci.* **2022**, *23*, 6935. <https://doi.org/10.3390/ijms23136935>

Academic Editor: Alessandro Cannavo

Received: 23 May 2022

Accepted: 20 June 2022

Published: 22 June 2022

**Publisher’s Note:** MDPI stays neutral with regard to jurisdictional claims in published maps and institutional affiliations.

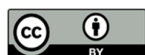

**Copyright:** © 2022 by the authors. Licensee MDPI, Basel, Switzerland. This article is an open access article distributed under the terms and conditions of the Creative Commons Attribution (CC BY) license (<https://creativecommons.org/licenses/by/4.0/>).

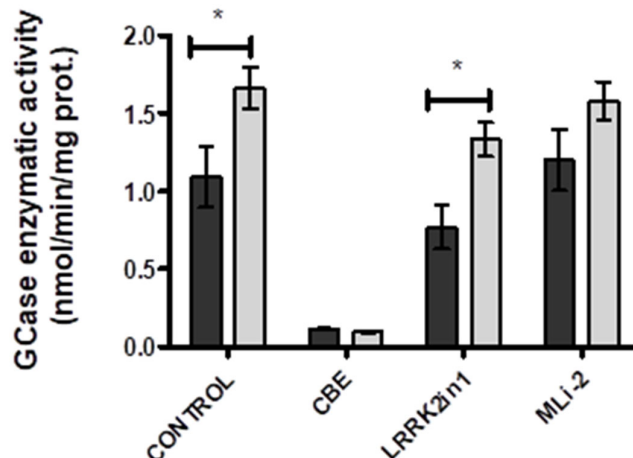

**Figure S1.** GCase enzymatic activity of cell lysates treated with DMSO (as control), LRRK2in1, MLI2 and CBE after 24 h (black bars) and 72 h (grey bars) incubations.

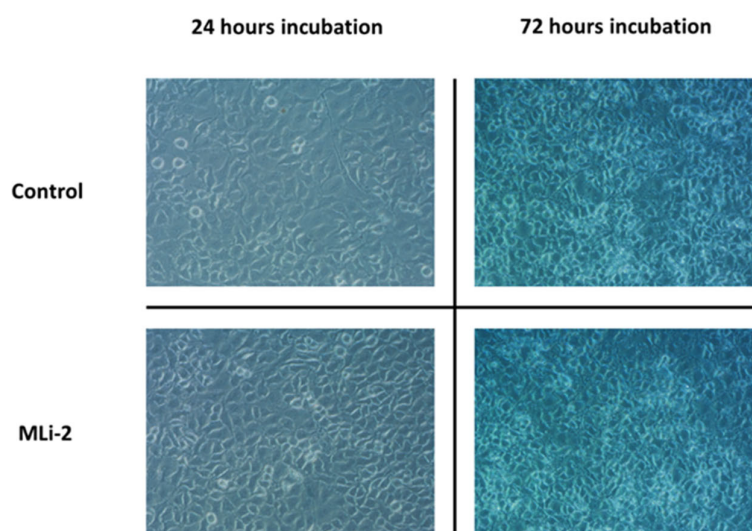

**Figure S2.** Representative images (10X) from inverted phase-contrast microscope of H4 human neuroglioma cells after incubation with MLi-2 (600nM) or DMSO (0.15% v/v) as control for 24 and 72h.
